# Supplementary material
Source: bioRxiv or medRxiv preprint supplement (https://medrxiv.org/highwire/filestream/80136/field_highwire_adjunct_files/2/2020.05.06.20089573-3.pdf)

**Supplementary Figure 3.** The time line depicts the median number of days from the onset of symptoms to clinical events. Patients are separated into two groups, with (i.e. the case group) and without (i.e. the control group) recurrence of PCR positivity. Clinical events include admission, anal swab tested positive, nasopharyngeal swab tested negative, discharge, and quarantine ended due to either retest positive or release to home.

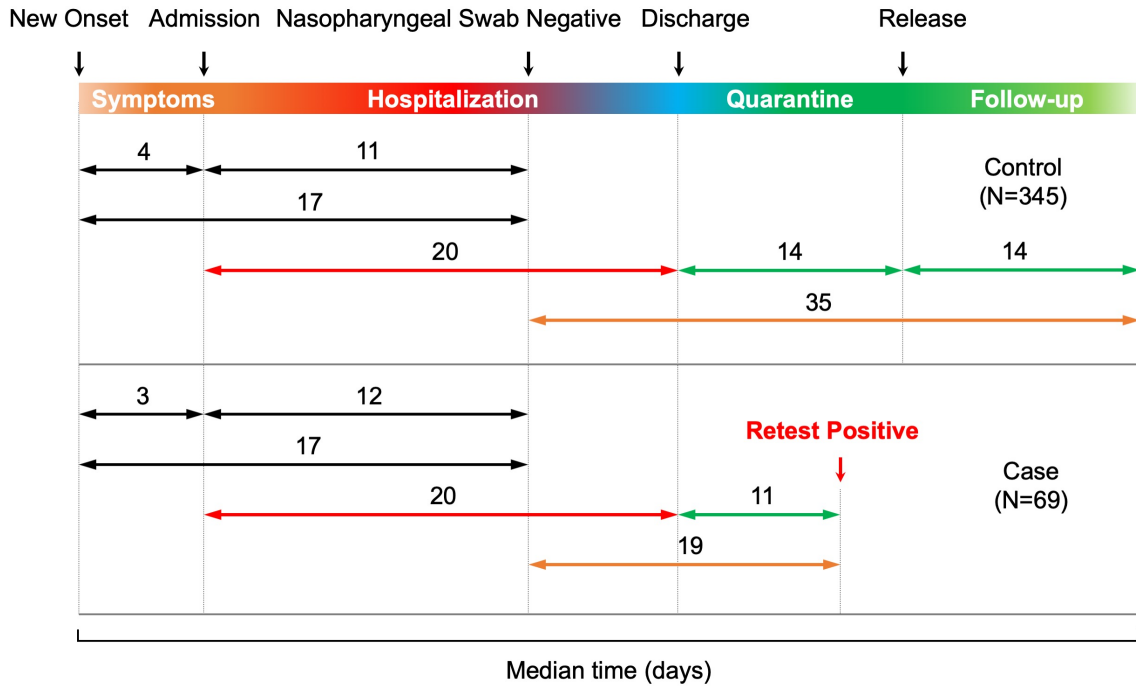

Supplement: Supplementary file [file 2020.05.06.20089573-3.pdf]
